# Supplementary material
Source: PubMed Central journal article supplement (PMC3568567)
Supplement: AEM.02578-12_zam999104041so1.pdf [file AEM.02578-12_zam999104041so1.pdf]

## Supplemental Material

### Gel shift assay

The Double-stranded artificial DNA binding sequence for the HDH-ADB1, HK-ADB2, and TS-ADB3 of the pSC-1 plasmid was produced by PCR amplification of pSC-1 plasmid template with oligonucleotides end-labeled with [ $\gamma$ - $^{32}$ P]ATP and T4 polynucleotide kinase (New England Biolabs, Beverly, MA, USA). PCR products were purified and incubated with 10  $\mu$ g of each ADB-fused enzyme (HDH-ADB1, HK-ADB2, or TS-ADB3) in binding buffer [4 mM Tris-HCl (pH 7.5), 80 mM NaCl, 0.5 mM ZnSO<sub>4</sub>, 1 mM EDTA, 0.5 mM DTT, 5% glycerol] at 25°C for 30 min. Samples were electrophoresed for 3 hours at 100 V on a nondenaturing polyacrylamide gel (6% [29:1] acryl-bisacrylamide, 0.25 $\times$  TBE, 5% glycerol).

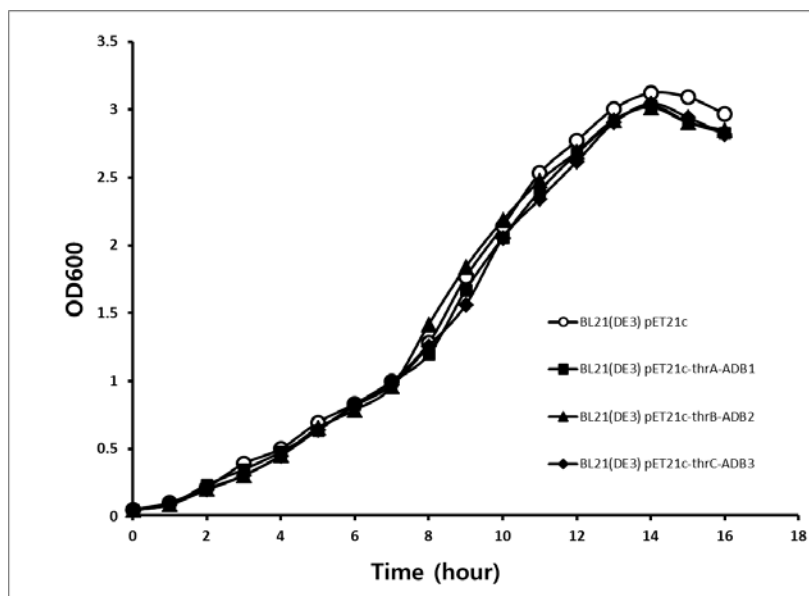

**Figure S1. Effect of ADB-fused enzyme overexpression on the growth of *Escherichia coli*.**

Cells harboring each plasmid (pET21c-thrA-ADB1, pET21c-thrB-ADB2, or pET21c-thrC-ADB3) for the expression of ADB-fused enzymes (HDH-ADB1, HK-ADB2, or TS-ADB3, respectively) were cultivated in a 500 ml flask containing 100 ml of LB medium supplemented with 0.1 mM of IPTG. During the cultivation, the growth of cells was measured every hour by spectrophotometry.

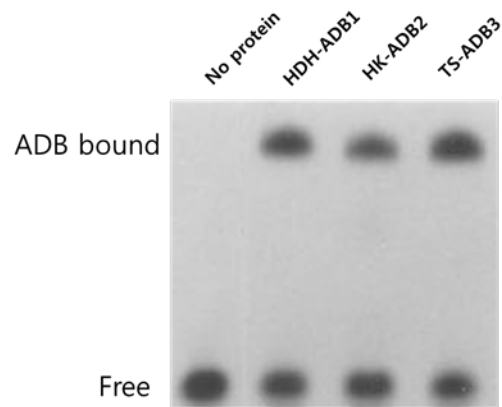

**Figure S2. Binding of the ADB-fused enzymes (HDH-ADB1, HK-ADB2, and TS-ADB3) to their target DNA sequences.** The binding of ADB-fused enzymes to their target sequences were confirmed by a gel shift assay using the 5' end-labeled target DNA sequence of the pSC-1 plasmid (refer to the gel shift assay in the Supplemental Material).

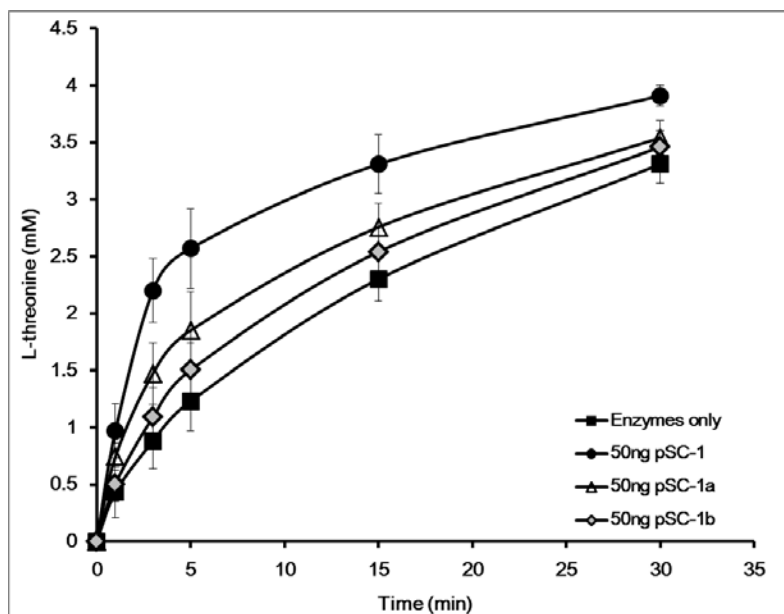

**Figure S3. *In vitro* L-threonine production assay.** Threonine production rates from the three different scaffold plasmids (pSC-1, pSC-1a, and pSC-1b) which have different distances (20-, 15-, 25-bp, respectively) between the binding sites of ADB-fused enzymes were measured by the *in vitro* enzymatic conversion of aspartate semialdehyde to threonine (refer to Materials and Methods). The data shown are the means for three independent experiments.
